# Supplementary material
Source: Research Square preprint supplement (doi:10.21203/rs.3.rs-8954542/v1)
Supplement: Supplementary file 1 [file 7533f473e40d652b161e4ba2.docx]

**Standard Operating Procedure (SOP)**

**5-Hour Temperature-Dependent Raman Study of Monolayer Graphene (Heating–Cooling Hysteresis)**

**1. Sample Information**

- **Material: CVD-grown monolayer graphene on 300 nm SiO₂/Si**
- **Supplier Verification:**
  - **Monolayer confirmed**
  - **Low defect density: *I(D)/I(G) < 0.1***
  - **Monolayer signature: *I(G)/I(2D) < 1***
  - **Areal coverage > 95%**

**Purpose:
High-quality, manufacturer-verified graphene ensures that observed effects arise from thermal irreversibility, not defects or sample inhomogeneity.**

**2. Instrumentation**

- **Raman System: Confocal micro-Raman**
- **Laser: 532 nm CW**
- **Laser Power (at sample): 0.5 mW**
- **Objective: 50×, NA ≥ 0.75**
- **Spectral Range: 1200–3200 cm⁻¹**
- **Spectral Resolution: ≤ 1.5 cm⁻¹**
- **Detector: CCD**
- **Temperature Stage: 300–500 K**
- **Temperature Stability: ±1 K**
- **Atmosphere: Ambient (note if N₂ or vacuum)**

**3. Calibration & Pre-Checks (45 minutes)**

**3.1 Wavenumber Calibration (15 min)**

- **Calibrate using Si peak at 520.0 cm⁻¹**
- **Acceptable drift: ±0.5 cm⁻¹**

**3.2 Focus, Alignment & Spot Selection (15 min)**

- **Identify uniform graphene region**
- **Mark primary measurement spot**
- **Mark secondary sacrificial spot (for power checks)**

**3.3 Laser Heating Verification (15 min)**

- **At RT, collect spectra at:**
  - **0.3 mW**
  - **0.5 mW**
  - **0.7 mW**
- **Confirm linear phonon shift vs power**

**4. Measurement Protocol (Total Experimental Time ≈ 5 Hours)**

**Hour 1 | Room-Temperature Baseline (60 min)**

- **Measure three distinct spots**
- **Integration time: 30–60 s per spectrum**
- **Acquire Stokes + Anti-Stokes**
- **Purpose:**
  - **Establish baseline Raman parameters**
  - **Confirm spatial uniformity**

**Hour 2 | Heating Ramp (300 → 500 K) (75 min)**

**Temperatures: 300, 350, 400, 450, 500 K**

**At each temperature:**

- **Stabilization: 5 min**
- **Acquisition: 2 × 60 s (Stokes + Anti-Stokes)**
- **Measurement at fixed primary spot**

**Total per temperature ≈ 15 min**

**Hour 3 | High-Temperature Hold & Control (45 min)**

- **Hold at 500 K for 20 min**
- **Acquire:**
  - **Repeated spectra at fixed power**
  - **One high-T power check (0.3 / 0.5 / 0.7 mW) at sacrificial spot**
- **Purpose:**
  - **Confirm thermal equilibrium**
  - **Rule out power-induced artifacts**

**Hour 4 | Cooling Ramp (500 → 300 K) (75 min)**

**Temperatures: 500, 450, 400, 350, 300 K**

- **Same stabilization and acquisition protocol as heating**
- **Measure exact same spot used in heating ramp**

**Hour 5 | Post-Cycle Verification & Mapping (45 min)**

- **RT spectrum at original spot**
- **Small RT Raman map (5×5 points, 1–2 µm pitch)**
- **Verify:**
  - **No permanent damage**
  - **No defect generation**
- **Backup all data**

**5. Extracted Parameters**

- **G peak position and FWHM**
- **2D peak position and FWHM**
- **I(2D)/I(G), I(D)/I(G)**
- **Anti-Stokes/Stokes ratio (G mode)**

**6. Data Analysis**

**6.1 Local Temperature Validation**

**Acceptance:
|T_local − T_stage| ≤ 5 K**

**6.2 Hysteresis Quantification**

**Applied to G and 2D modes.**

**7. Acceptance Criteria**

- **Si calibration within ±0.5 cm⁻¹**
- **No permanent RT peak shift**
- **Stable I(D)/I(G) < 0.1**
- **Reproducible Anti-Stokes temperature**
- **No visible degradation**

**8. Expected Results**

- **Temperature-dependent phonon softening**
- **Clear heating–cooling hysteresis**
- **Linewidth asymmetry indicating irreversible coupling**
- **Absence of defect-driven artifacts**

**9. Data Handling**

- **Raw spectra archived by temperature and ramp direction**
- **Fitting outputs stored as CSV**
- **Scripts version-controlled**
